# Supplementary material for: Live-cell analysis of DNA methylation during sexual reproduction in Arabidopsis reveals context and sex-specific dynamics controlled by noncanonical RdDM
Source: PubMed Central journal article supplement — Genes Dev. 2017 Jan 1;31(1):72–83. doi: 10.1101/gad.289397.116 (PMC5287115; doi:10.1101/gad.289397.116), 2017-01-01
Supplement: supp_gad.289397.116_Supplemental_Tables_S1_S2.pdf [file supp_gad.289397.116_Supplemental_Tables_S1_S2.pdf]

**Table S1.** Mutants and marker lines used in this study.

| <b>Gene</b>                           | <b>Mutant allele</b>                       | <b>Stock</b>                                            | <b>Reference</b>     |
|---------------------------------------|--------------------------------------------|---------------------------------------------------------|----------------------|
| <b><i>CMT2</i></b>                    | <i>cmt2-3</i>                              | SALK 012874                                             | Stroud et al. 2014   |
| <b><i>CMT3</i></b>                    | <i>cmt3-11</i>                             | SALK 148381                                             | Chan et al. 2006     |
| <b><i>DDM1</i></b>                    | <i>ddm1-2</i>                              |                                                         | Jeddeloh et al. 1999 |
| <b><i>DRM2</i></b>                    | <i>drm2-2</i>                              | SALK 150863                                             | Chan et al. 2006     |
| <b><i>DRM1 DRM2<br/>CMT2 CMT3</i></b> | <i>drm1-2; drm2-2;<br/>cmt2-7; cmt3-11</i> | SALK 031705, SALK 150863,<br>WISCDSLOX7E02, SALK 148381 | Chan et al. 2006     |
| <b><i>NRPD1</i></b>                   | <i>nrpd1a-1</i>                            | SALK 583051                                             | Pontier et al. 2005  |
| <b><i>NRDE1</i></b>                   | <i>nrpd1b-11</i>                           | SALK 029919                                             | Pontier et al. 2005  |

## Table S2. Primers used in this study

### Primers for mCG-Venus expression in an expression plasmid

|             |                              |
|-------------|------------------------------|
| mCG-Venus-F | CCCCCCCATGGCGCAGACGGAATCGAAG |
| mCG-Venus-R | CCCCCTCGAGCTACTTGTACAGCTCGTC |

### Primers for generating pK7m34GW-pHTR5::NLS-GUS-GFP

|                |                                                     |
|----------------|-----------------------------------------------------|
| pHTR5-REVattB1 | GGGGACTGCTTTTTTGTACAAACTTGctgttcaacaattaacaagatttag |
| pHTR5-FWDattB4 | GGGGACTGCTTTTTTGTACAAACTTGagatccgatataaaaaatttgaatc |
